# Supplementary material for: Risk of non-affective psychotic disorder and post-traumatic stress disorder by refugee status in Sweden
Source: PubMed Central journal article supplement (PMC7035697; doi:10.1136/jech-2019-212798), 2019-11-25
Supplement: jech-2019-212798supp001.pdf [file jech-2019-212798supp001.pdf]

**Supplementary table 1:** Countries or cluster of countries included in the regions of origin by refugee status in percent (%).

| <b>Region of origin</b>               |                                      | <b>Non-quota %</b> | <b>Quota %</b> |
|---------------------------------------|--------------------------------------|--------------------|----------------|
| <b>Asia</b>                           | Central Asia                         | 59.3               | 26.2           |
|                                       | South East Asia                      | 0.6                | 13.9           |
| <b>Eastern Europe &amp; Russia</b>    | Russia and the Baltic states         | 17.6               | 5.8            |
|                                       | Eastern Europe                       | 5.2                | 0.8            |
|                                       | Former Yugoslavia                    | 60.7               | 9.9            |
| <b>Middle East &amp; North Africa</b> | Iraq                                 | 59.0               | 15.3           |
|                                       | Iran                                 | 6.1                | 7.4            |
|                                       | Middle East Other                    | 9.2                | 1.5            |
|                                       | North Africa                         | 1.3                | 0.2            |
| <b>Sub-Saharan Africa</b>             | Africa Other                         | 4.5                | 6.1            |
|                                       | West Africa                          | 0.9                | 2.0            |
|                                       | Somalia, Eritrea, Ethiopia, Djibouti | 79.5               | 7.0            |
